# Supplementary material for: Photoprotective Effects of Two New Morin-Schiff Base Derivatives on UVB-Irradiated HaCaT Cells
Source: MDPI journal article supplement (doi:10.3390/antiox13010134), 2024-01-22
Supplement: s1 [file s1]

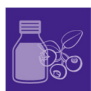

## Supplementary Material

Figures:

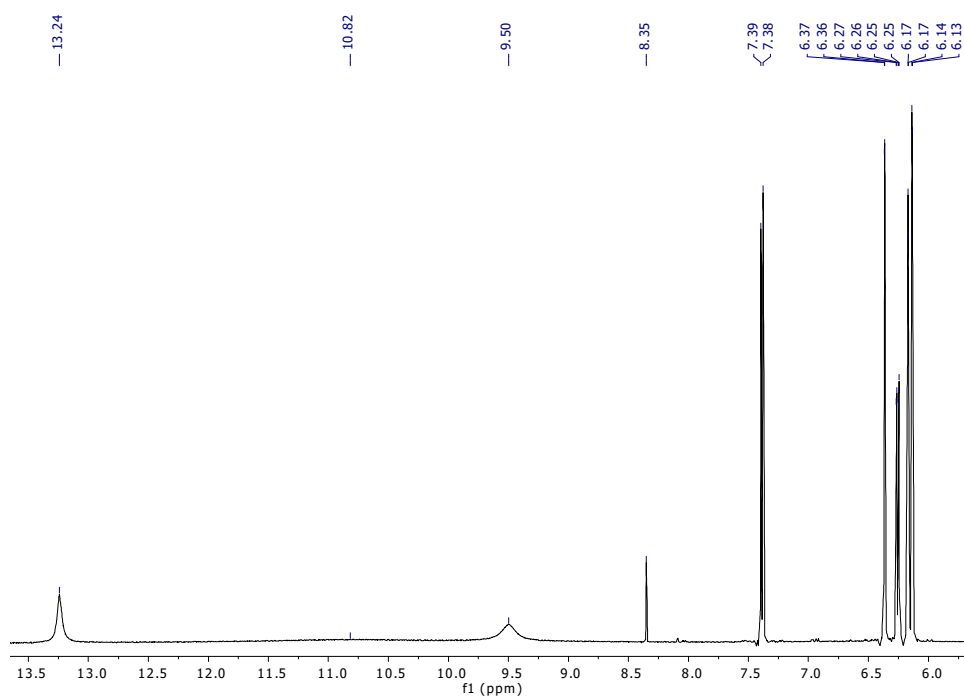Figure S1.  $^1\text{H}$  NMR spectrum of morin oxime (2), at 400 MHz, in  $\text{DMSO-d}_6$ .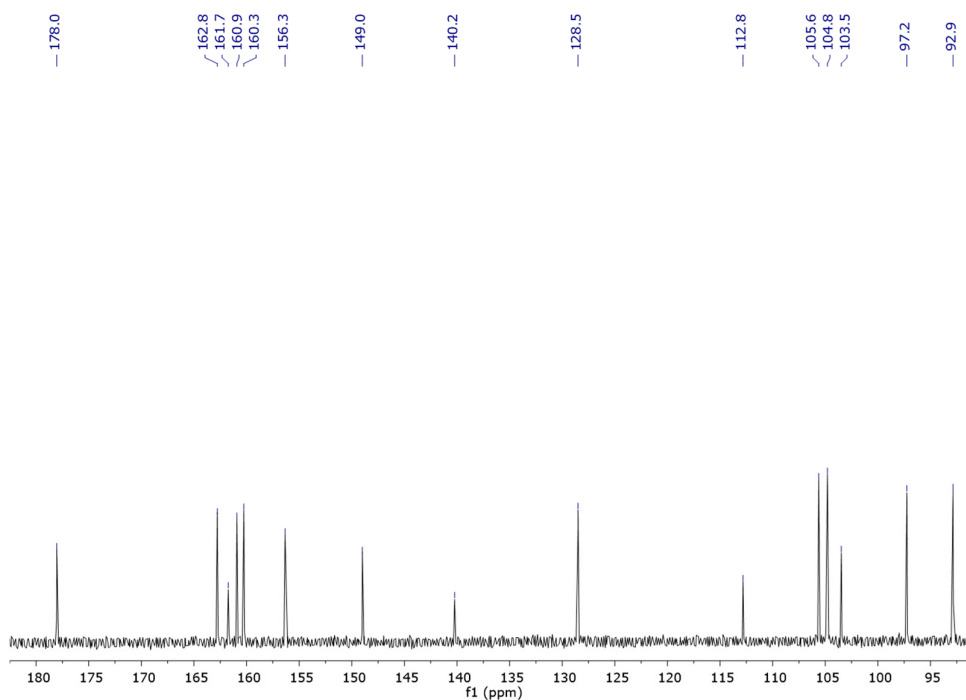Figure S2.  $^{13}\text{C}$  NMR spectrum of morin oxime (2), at 100 MHz, in  $\text{DMSO-d}_6$ .

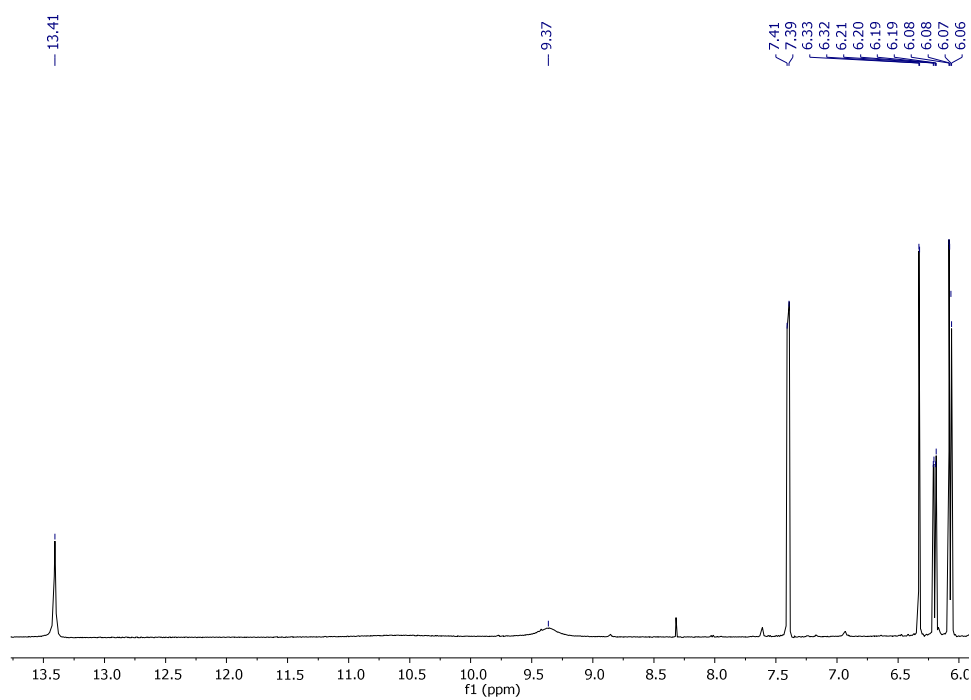

Figure S3. <sup>1</sup>H NMR spectrum of morin semicarbazone (3), at 400 MHz, in DMSO-d<sub>6</sub>;

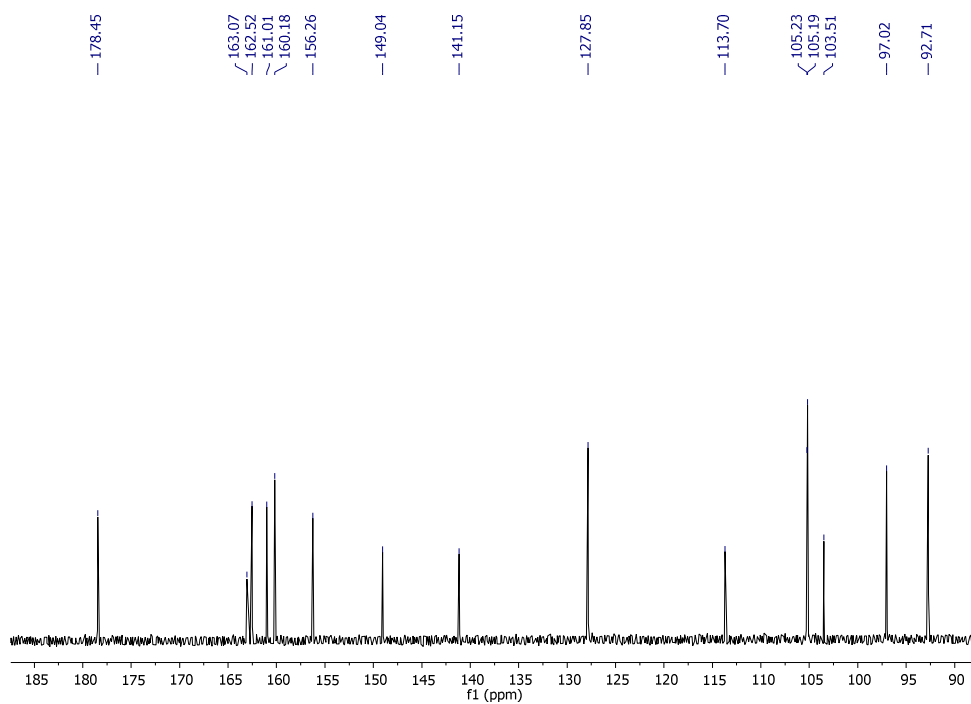

Figure S4. <sup>13</sup>C NMR spectrum of morin semicarbazone (3), at 100 MHz, in DMSO-d<sub>6</sub>;

Table:

**Table S1.** Molar absorption coefficient values of morin (1) and its derivatives morin oxime (2) and morin semicarbazone (3).

| $\lambda$ (nm) | Molar absorption coefficient ( $\epsilon$ ) |       |       |
|----------------|---------------------------------------------|-------|-------|
|                | 1                                           | 2     | 3     |
| 210            | 40426                                       | 35090 | 25453 |
| 265            | 25450                                       | 16756 | 16664 |
| 390            | 29976                                       | 13198 | 16549 |
